# Supplementary material
Source: PubMed Central journal article supplement (PMC7483924)
Supplement: NIHMS1592233-supplement-1.pdf [file NIHMS1592233-supplement-1.pdf]

**Supplementary Table 1.** Case-control comparison of mean element levels in nails.

| Element | Controls                                | ALS patients                           | univariate<br>p-value |
|---------|-----------------------------------------|----------------------------------------|-----------------------|
|         | n=210<br>log <sub>10</sub> mean<br>(SD) | n=70<br>log <sub>10</sub> mean<br>(SD) |                       |
| Hg      | -1.03 (0.50)                            | -1.13 (0.58)                           | 0.14                  |
| As      | -1.29 (0.27)                            | -1.29 (0.29)                           | 0.98                  |
| Cd      | -2.21 (0.46)                            | -2.23 (0.43)                           | 0.72                  |
| Co      | -2.14 (0.45)                            | -2.11 (0.43)                           | 0.59                  |
| Cr      | -0.65 (0.61)                            | -0.68 (0.58)                           | 0.69                  |
| Cu      | 0.56 (0.14)                             | 0.60 (0.15)                            | 0.087                 |
| Fe      | 1.12 (0.36)                             | 1.09 (0.42)                            | 0.58                  |
| Mn      | -0.73 (0.47)                            | -0.73 (0.47)                           | 0.97                  |
| Pb      | -1.01 (0.41)                            | -0.98 (0.45)                           | 0.60                  |
| Se      | -0.02 (0.08)                            | -0.02 (0.07)                           | 0.77                  |

\*Adjusted for age and smoking.

**Supplementary table 2.** Case-control comparison of element levels in nails categorized above vs. below the 90th percentile.

| Element | ≥90th percentile<br>log <sub>10</sub> ug/g | Controls       | ALS patients  | univariate<br>p-value |
|---------|--------------------------------------------|----------------|---------------|-----------------------|
|         |                                            | n=210<br>n (%) | n=70<br>n (%) |                       |
| Hg      | < -0.42                                    | 195 (92.9)     | 57 (81.4)     | 0.011                 |
|         | ≥ -0.42                                    | 15 (7.1)       | 13 (18.6)     |                       |
| As      | < -0.94                                    | 191 (91.0)     | 61 (87.1)     | 0.49                  |
|         | ≥ -0.94                                    | 19 (9.0)       | 9 (12.9)      |                       |
| Cd      | < -1.67                                    | 189 (90.0)     | 63 (90.0)     | 1                     |
|         | ≥ -1.67                                    | 21 (10.0)      | 7 (10.0)      |                       |
| Co      | < -1.62                                    | 189 (90.0)     | 63 (90.0)     | 1                     |
|         | ≥ -1.62                                    | 21 (10.0)      | 7 (10.0)      |                       |
| Cr      | < 0.0020                                   | 190 (90.5)     | 62 (88.6)     | 0.82                  |
|         | ≥ 0.0020                                   | 20 (9.5)       | 8 (11.4)      |                       |
| Cu      | < 0.75                                     | 193 (91.9)     | 59 (84.3)     | 0.11                  |
|         | ≥ 0.75                                     | 17 (8.1)       | 11 (15.7)     |                       |
| Fe      | < 1.54                                     | 185 (88.1)     | 67 (95.7)     | 0.11                  |
|         | ≥ 1.54                                     | 25 (11.9)      | 3 (4.3)       |                       |
| Mn      | < -0.14                                    | 191 (91.0)     | 61 (87.1)     | 0.49                  |
|         | ≥ -0.14                                    | 19 (9.0)       | 9 (12.9)      |                       |
| Pb      | < -0.49                                    | 191 (91.0)     | 61 (87.1)     | 0.49                  |
|         | ≥ -0.49                                    | 19 (9.0)       | 9 (12.9)      |                       |
| Se      | < 0.075                                    | 188 (89.5)     | 64 (91.4)     | 0.82                  |
|         | ≥ 0.075                                    | 22 (10.5)      | 6 (8.6)       |                       |

Female controls with  
trace element data  
n=1216 (<age 67)

3:1 matched to ALS  
patients on age  
**N=210**

ALS patients  
2013-2015  
n=330

Females n=112

- N=33 not assessed
- N=84 trace element data
  - **N=70** (<age 67)

Males n=218
